# Supplementary material
Source: HighWire-hosted journal article supplement (https://jnis.bmj.com/highwire/filestream/172252/field_highwire_adjunct_files/0/neurintsurg-2022-018969supp001_data_supplement.pdf)
Supplement: neurintsurg-2022-018969supp001_data_supplement.pdf [file neurintsurg-2022-018969supp001_data_supplement.pdf]

**Annex 1: COATING Committees****Scientific Steering Committee (SSC)**

Pr Laurent Pierot (Principal Investigator) – CHU Maison-Blanche, Reims, France

Pr Saleh Lamin – University Hospital Birmingham – Queen Elizabeth Hospital, Birmingham,  
United Kingdom

Pr Christophe Cognard – CHU Purpan, Toulouse, France

Pr Laurent Spelle – APHP – CHU Kremlin-Bicêtre, Le Kremlin-Bicêtre, France

**Data Monitoring Committee (DMC)**

Pr Jens Fiehler - University Medical Center Hamburg Eppendorf, Hamburg, Germany

Pr Hubert Desal – CHU Nantes, Nantes, France

Dr Richard P. Chiacchierini – Gaithersburg, Maryland, USA

Prof. Peter Schramm – UKSH Campus Lübeck, Lübeck, Germany

**Clinical Event Committee (CEC)**

Pr Denis Herbetreau – CHU Bretonneau, Tours, France

Pr Anastosios Mpotsaris – München Klinik Harlaching, Munich, Germany

Pr Urs Fischer – University Hospital Basel, Basel, Switzerland

**Imaging Core Laboratory**

Pr Frédéric Clarençon – APHP - CHU La Pitié-Salpêtrière, Paris, France

Pr Tobias Engelhorn – Friedrich Alexander University, Erlangen, Germany

**Statistician**

Bruce C. Touch – Plantation – Florida, USA

**Annex 2: List of participating centers****France**

CHU Reims – Reims - Pr Laurent Pierot

CHU Kremlin-Bicêtre – Kremlin-Bicêtre - Pr Laurent Spelle

CHU Toulouse – Toulouse -Pr Christophe Cognard/Dr Anne-Christine Januel

CHU Bordeaux – - Bordeaux - Pr Xavier Barreau

CHU Lyon – Lyon - Pr Omer Eker

CHU Montpellier – Montpellier - Pr Vincent Costalat

**United Kingdom**

University Hospital – Birmingham – Pr Saleh Lamin

Royal Infirmary – Edinburgh – Dr Peter Keston

**Germany**

Klinikum Stuttgart – Dr Victoria Hellstern, Prof. Hans Henkes

Helios Klinikum Erfurt – Erfurt – Prof. Joachim Klisch

Klinikum Augsburg – Augsburg – Prof. Ansgar Berlis

Klinikum Nürnberg Süd – Nürnberg – Dr Markus Holtmannspoetter

**Italy**

AO San Carlo Borromeo – Milano – Dr Luca Valvassori

Research Hospital Foundation C. Besta – Dr Elisa Ciceri

**Israel**

Hadassah University Medical Center – Jerusalem – Pr José E. Cohen

**Switzerland**

Universitätsspital Basel – Basel - Pr Marios-Nikos Psychogios
